# Supplementary material
Source: publisher figshare collection journal article supplement (https://acs.figshare.com/ndownloader/files/9425800)
Supplement: Supplementary file 1 [file 9425800]

# Supporting Information

## One-step Synthesis of 3D Network-like $\text{Ni}_x\text{Co}_{1-x}\text{MoO}_4$ Porous Nanosheets for High Performance Battery-type Hybrid Supercapacitors

*Pengxiao Sun<sup>†</sup>, Chenggang Wang<sup>†</sup>, Weidong He, Peiyu Hou, Xijin Xu\**

*<sup>†</sup>These authors contributed equally to this work and should be considered co-first authors.*

*School of Physics and Technology, University of Jinan, 336 West Road of Nan  
Xinzhuang, Jinan, 250022, Shandong Province, Peoples Republic of China*

*\* Corresponding E-mails: sps\_xuxj@ujn.edu.cn*

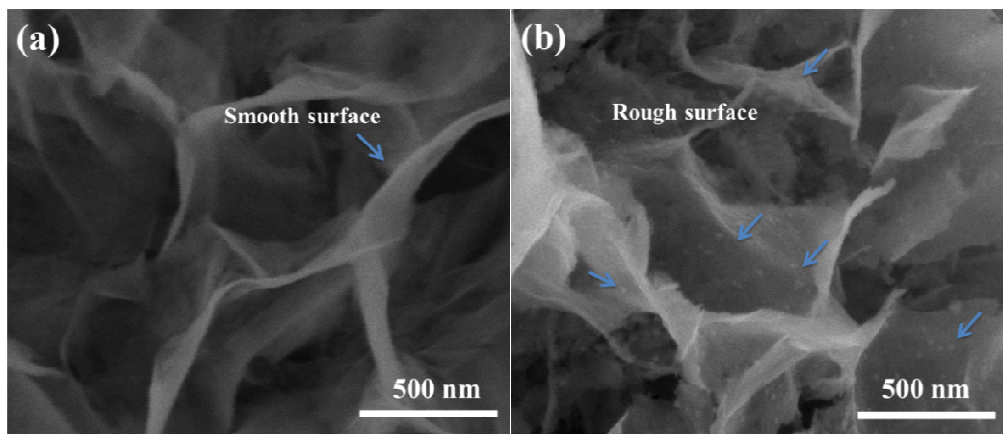

**Fig. S1** SEM images: (a) the  $\text{CoMoO}_4$  nanosheets; and (b)  $\text{Ni}_x\text{Co}_{1-x}\text{MoO}_4$  nanosheets.

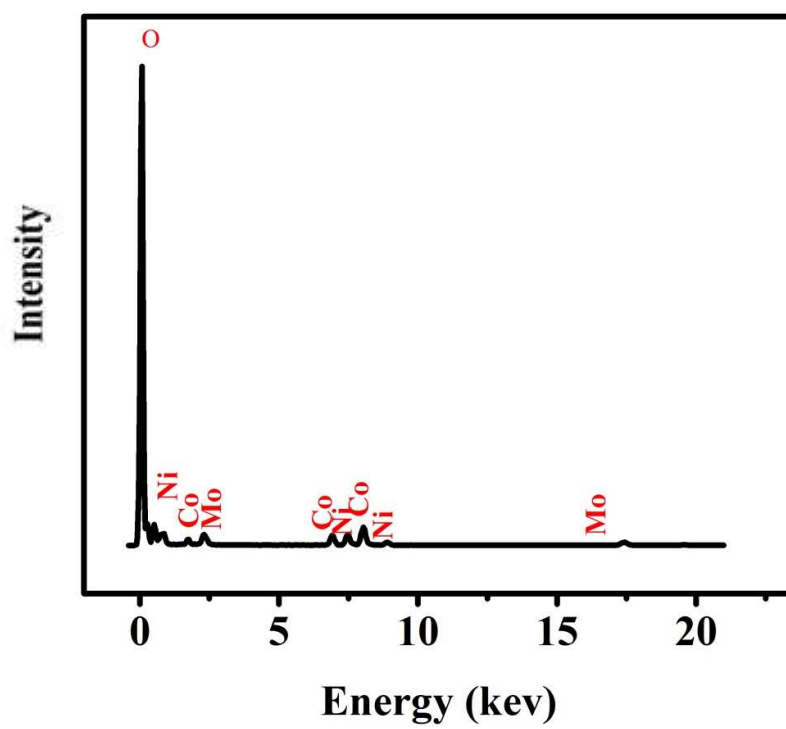

**Fig. S2** EDS images of the  $\text{Ni}_{0.75}\text{Co}_{0.25}\text{MoO}_4$  nanosheets.

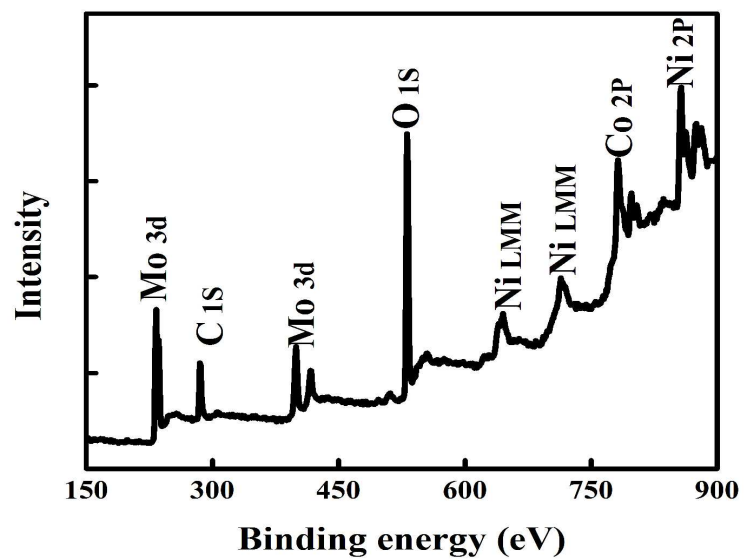

Fig. S3 XPS spectrum of  $\text{Ni}_x\text{Co}_{1-x}\text{MoO}_4$  ( $x=0.75$ ).

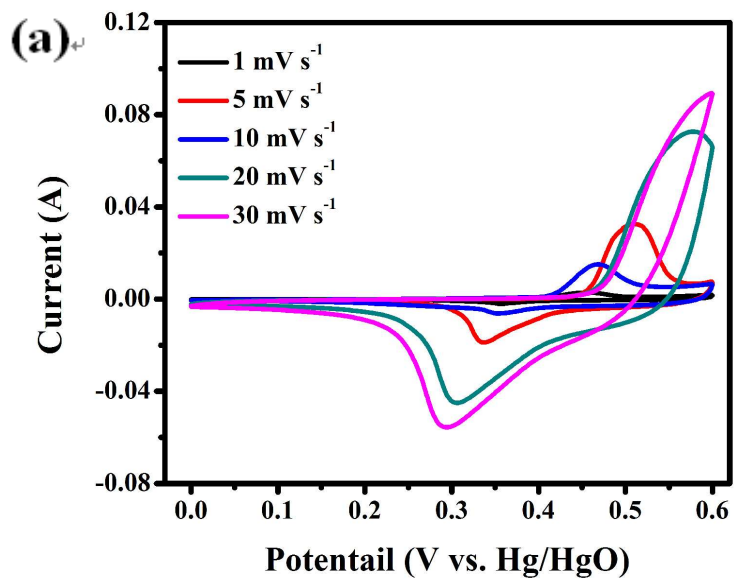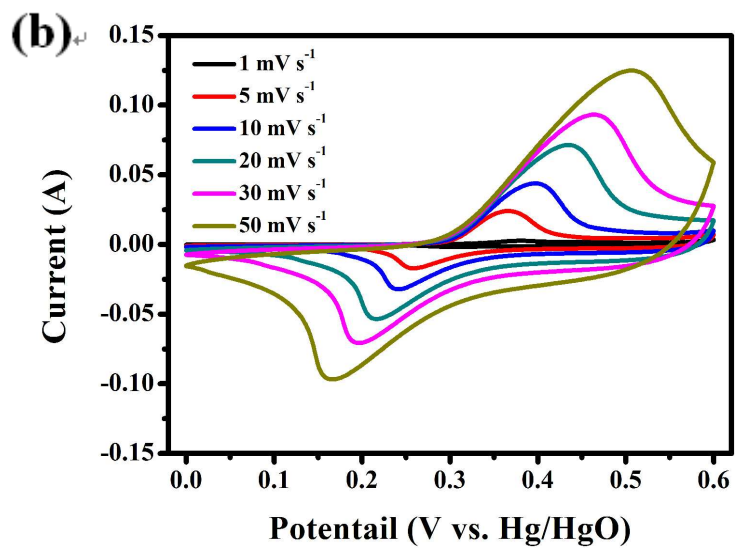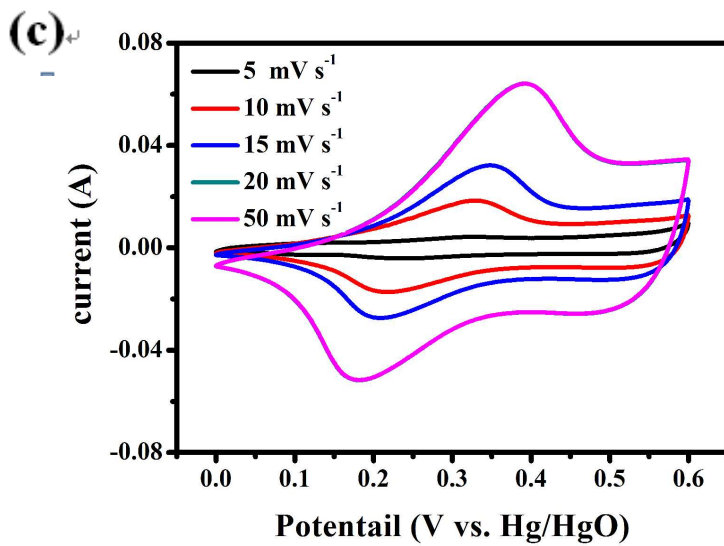

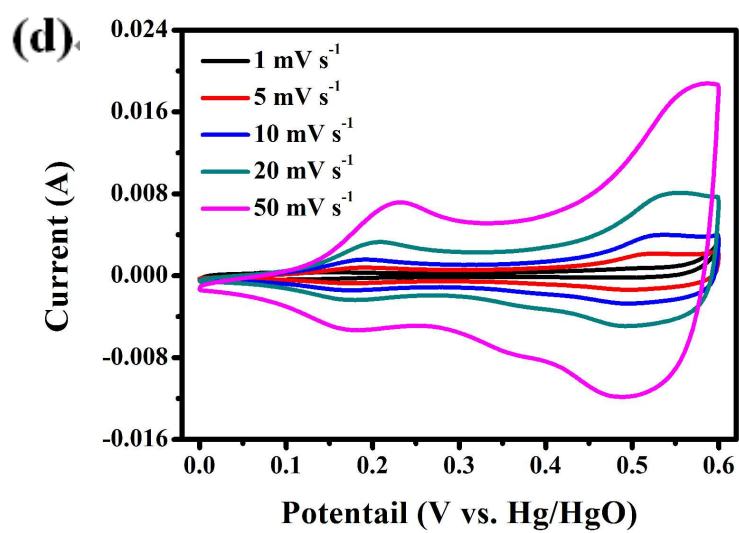

**Fig. S4** CV curves of  $\text{Ni}_x\text{Co}_{1-x}\text{MoO}_4$  nanosheets with different scan rates: (a)  $\text{NiMoO}_4$ ; (b)  $\text{Ni}_{0.25}\text{Co}_{0.75}\text{MoO}_4$ ; (c)  $\text{Ni}_{0.5}\text{Co}_{0.5}\text{MoO}_4$ ; (d)  $\text{CoMoO}_4$ .

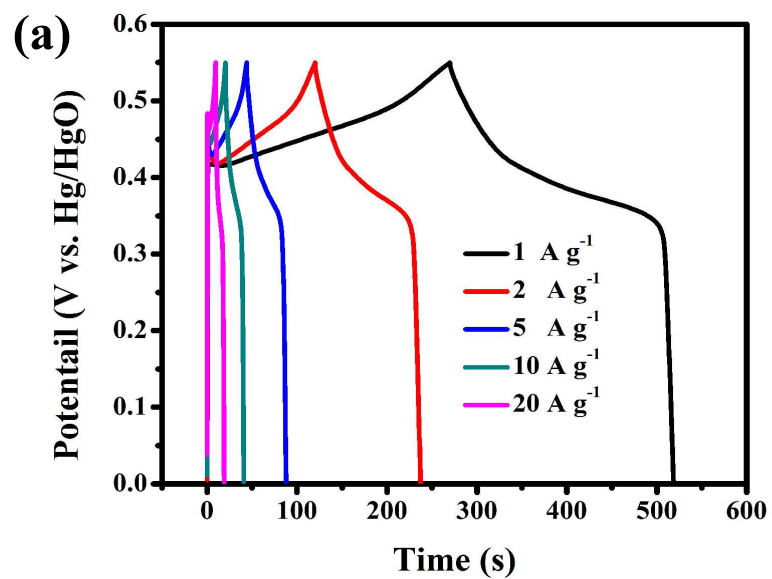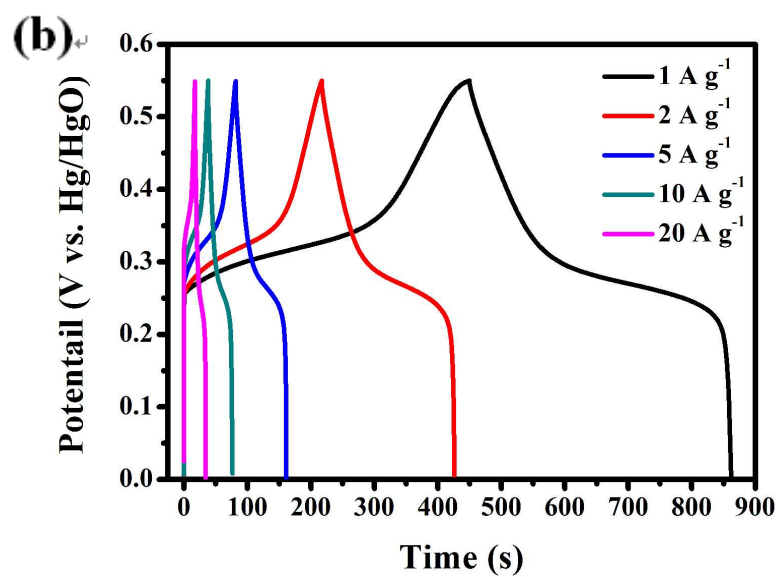

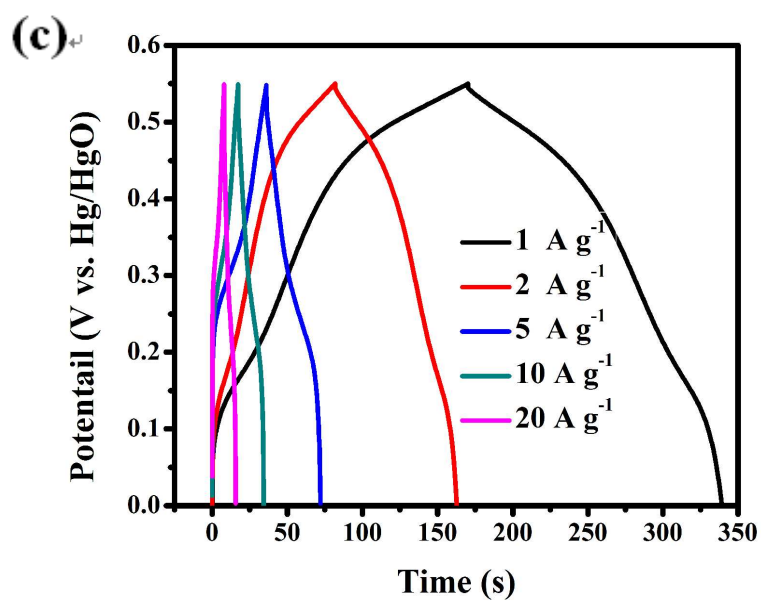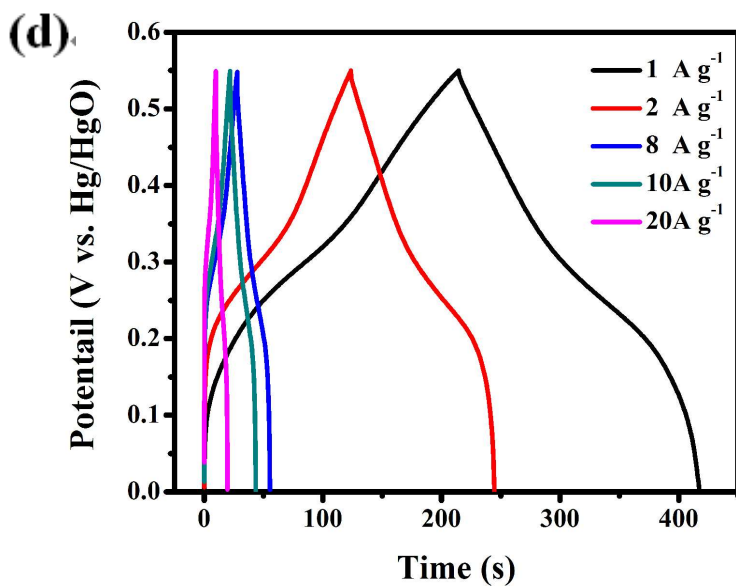

**Fig. S5** GCD curves of  $\text{Ni}_x\text{Co}_{1-x}\text{MoO}_4$  at different current densities: (a)  $\text{NiMoO}_4$  (b)  $\text{Ni}_{0.5}\text{Co}_{0.5}\text{MoO}_4$  (c)  $\text{Ni}_{0.75}\text{Co}_{0.25}\text{MoO}_4$  (d)  $\text{CoMoO}_4$ .

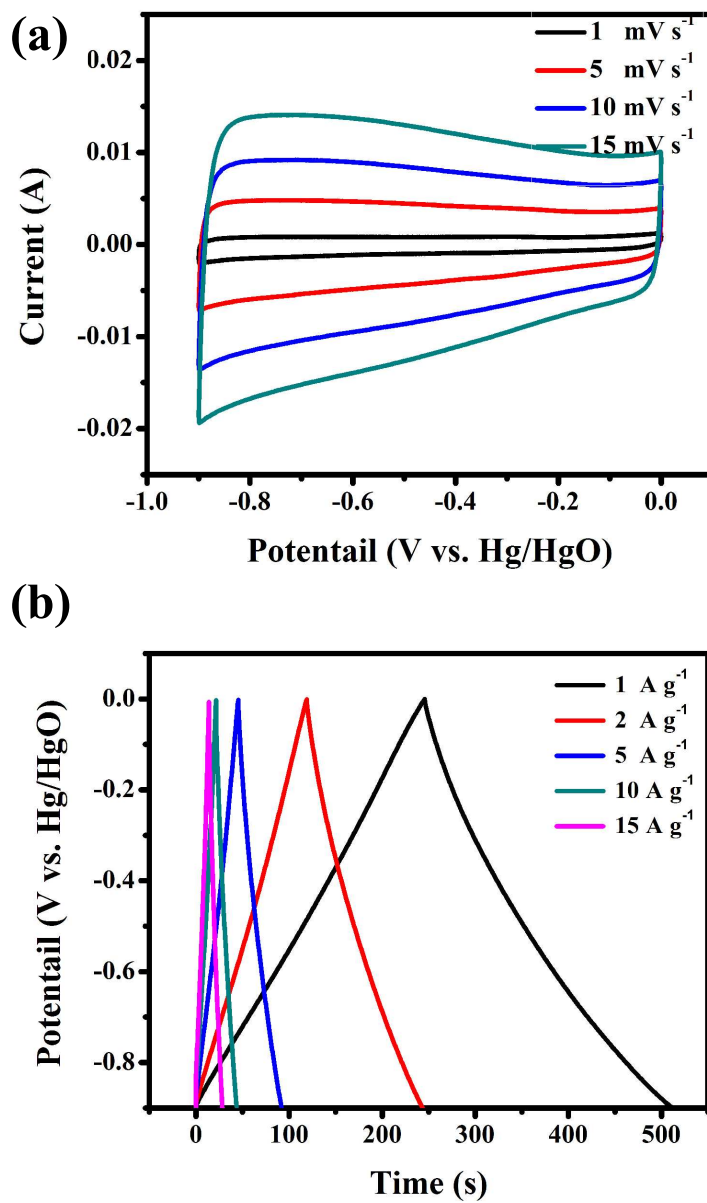

**Fig. S6** (a) CV curves of activated carbon with different scan rates; (b) GCD curves of activated carbon at different current densities.



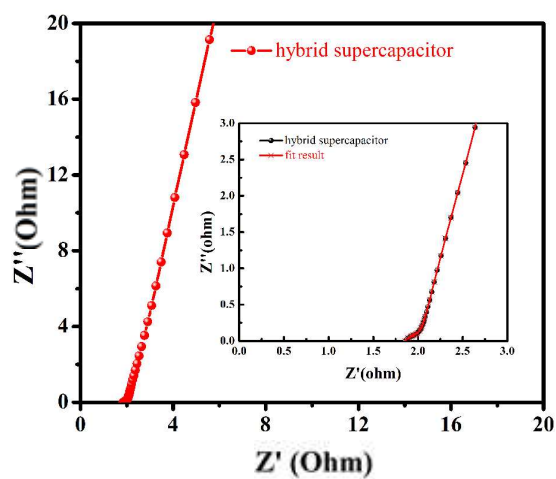

**Fig. S7** the typical EIS result of the full cell by fitting the Nyquist plots.

**Table S1** The EIS simulation of hybrid supercapacitors

| electrodes             | $R_s/\Omega$ | $R_{ct}/\Omega$ |
|------------------------|--------------|-----------------|
| hybrid supercapacitors | 1.88         | 0.17            |
